# Supplementary material
Source: publisher figshare collection journal article supplement (https://springernature.figshare.com/ndownloader/files/28130865)
Supplement: Supplementary file 1 [file 28130865]

datetime	id	value
1559358000	2	0.036
1559358000	3	0.049
1559358000	6	0.042
1559358900	2	0.032
1559358900	3	0.049
1559358900	6	0.04
1559359800	2	0.018
1559359800	3	0.05
1559359800	6	0.038
1559360700	2	0.022
1559360700	3	0.049
1559360700	6	0.013
1559361600	2	0.021
1559361600	3	0.049
1559361600	6	0.002
1559362500	2	0.009
1559362500	3	0.05
1559362500	6	0.002
1559363400	2	0.022
1559363400	3	0.049
1559363400	6	0.002
1559364300	2	0.022
1559364300	3	0.05
1559364300	6	0.002
1559365200	2	0.009
1559365200	3	0.05
1559365200	6	0.002
1559366100	2	0.021
1559366100	3	0.049
1559366100	6	0.002
1559367000	2	0.023
1559367000	3	0.049
1559367000	6	0.002
1559367900	2	0.011
1559367900	3	0.049
1559367900	6	0.002
1559368800	2	0.019
1559368800	3	0.049
1559368800	6	0.001
1559369700	2	0.022
1559369700	3	0.049
1559369700	6	0.002
1559370600	2	0.012
1559370600	3	0.049
1559370600	6	0.002
1559371500	2	0.017
1559371500	3	0.049
1559371500	6	0.002
1559372400	2	0.032
1559372400	3	0.05
1559372400	6	0.002
1559373300	2	0.043
1559373300	3	0.048
1559373300	6	0.002
1559374200	2	0.027
1559374200	3	0.049
1559374200	6	0.001
1559375100	2	0.046
1559375100	3	0.048
1559375100	6	0.002
1559376000	2	0.057
1559376000	3	0.049
1559376000	6	0.001
1559376900	2	0.204
1559376900	3	0.048
1559376900	6	0.002
1559377800	2	0.206
1559377800	3	0.048
1559377800	6	0.003
1559378700	2	0.202
1559378700	3	0.047
1559378700	6	0.044
1559379600	2	0.195
1559379600	3	0.049
1559379600	6	0.041
1559380500	2	0.204
1559380500	3	0.048
1559380500	6	0.038
1559381400	2	0.204
1559381400	3	0.048
1559381400	6	0.028
1559382300	2	0.193
1559382300	3	0.047
1559382300	6	0.028
1559383200	2	0.198
1559383200	3	0.048
1559383200	6	0.013
1559384100	2	0.203
1559384100	3	0.047
1559384100	6	0.01
1559385000	2	0.203
1559385000	3	0.048
1559385000	6	0.043
1559385900	2	0.198
1559385900	3	0.017
1559385900	6	0.042
1559386800	2	0.022
1559386800	3	0.0
1559386800	6	0.061
1559387700	2	0.021
1559387700	3	0.0
1559387700	6	0.032
1559388600	2	0.058
1559388600	3	0.0
1559388600	6	0.006
1559389500	2	0.024
1559389500	3	0.0
1559389500	6	0.006
1559390400	2	0.022
1559390400	3	0.0
1559390400	6	0.018
1559391300	2	0.009
1559391300	3	0.0
1559391300	6	0.022
1559392200	2	0.021
1559392200	3	0.0
1559392200	6	0.017
1559393100	2	0.022
1559393100	3	0.0
1559393100	6	0.002
1559394000	2	0.011
1559394000	3	0.0
1559394000	6	0.004
1559394900	2	0.019
1559394900	3	0.0
1559394900	6	0.005
1559395800	2	0.021
1559395800	3	0.0
1559395800	6	0.004
1559396700	2	0.013
1559396700	3	0.0
1559396700	6	0.004
1559397600	2	0.017
1559397600	3	0.0
1559397600	6	0.004
1559398500	2	0.021
1559398500	3	0.0
1559398500	6	0.021
1559399400	2	0.016
1559399400	3	0.0
1559399400	6	0.007
1559400300	2	0.022
1559400300	3	0.0
1559400300	6	0.004
1559401200	2	0.022
1559401200	3	0.0
1559401200	6	0.003
1559402100	2	0.018
1559402100	3	0.0
1559402100	6	0.004
1559403000	2	0.011
1559403000	3	0.0
1559403000	6	0.003
1559403900	2	0.038
1559403900	3	0.0
1559403900	6	0.003
1559404800	2	0.059
1559404800	3	0.0
1559404800	6	0.002
1559405700	2	0.051
1559405700	3	0.0
1559405700	6	0.003
1559406600	2	0.052
1559406600	3	0.0
1559406600	6	0.008
1559407500	2	0.037
1559407500	3	0.0
1559407500	6	0.045
1559408400	2	0.05
1559408400	3	0.0
1559408400	6	0.042
1559409300	2	0.051
1559409300	3	0.0
1559409300	6	0.041
1559410200	2	0.048
1559410200	3	0.0
1559410200	6	0.035
1559411100	2	0.039
1559411100	3	0.0
1559411100	6	0.003
1559412000	2	0.049
1559412000	3	0.0
1559412000	6	0.002
1559412900	2	0.05
1559412900	3	0.0
1559412900	6	0.002
1559413800	2	0.036
1559413800	3	0.0
1559413800	6	0.003
1559414700	2	0.042
1559414700	3	0.0
1559414700	6	0.004
1559415600	2	0.052
1559415600	3	0.0
1559415600	6	0.005
1559416500	2	0.049
1559416500	3	0.0
1559416500	6	0.003
1559417400	2	0.051
1559417400	3	0.0
1559417400	6	0.006
1559418300	2	0.046
1559418300	3	0.0
1559418300	6	0.016
1559419200	2	0.049
1559419200	3	0.0
1559419200	6	0.003
1559420100	2	0.024
1559420100	3	0.0
1559420100	6	0.015
1559421000	2	0.074
1559421000	3	0.0
1559421000	6	0.011
1559421900	2	0.015
1559421900	3	0.015
1559421900	6	0.047
1559422800	2	0.024
1559422800	3	0.035
1559422800	6	0.063
1559423700	2	0.027
1559423700	3	0.047
1559423700	6	0.074
1559424600	2	0.02
1559424600	3	0.047
1559424600	6	0.073
1559425500	2	0.018
1559425500	3	0.047
1559425500	6	0.078
1559426400	2	0.027
1559426400	3	0.049
1559426400	6	0.027
1559427300	2	0.031
1559427300	3	0.048
1559427300	6	0.027
1559428200	2	0.039
1559428200	3	0.048
1559428200	6	0.026
1559429100	2	0.037
1559429100	3	0.048
1559429100	6	0.025
1559430000	2	0.037
1559430000	3	0.049
1559430000	6	0.025
1559430900	2	0.031
1559430900	3	0.048
1559430900	6	0.009
1559431800	2	0.026
1559431800	3	0.048
1559431800	6	0.02
1559432700	2	0.036
1559432700	3	0.049
1559432700	6	0.232
1559433600	2	0.036
1559433600	3	0.049
1559433600	6	0.013
1559434500	2	0.025
1559434500	3	0.049
1559434500	6	0.003
1559435400	2	0.033
1559435400	3	0.048
1559435400	6	0.005
1559436300	2	0.036
1559436300	3	0.048
1559436300	6	0.037
1559437200	2	0.031
1559437200	3	0.048
1559437200	6	0.041
1559438100	2	0.027
1559438100	3	0.049
1559438100	6	0.039
1559439000	2	0.036
1559439000	3	0.05
1559439000	6	0.035
1559439900	2	0.042
1559439900	3	0.049
1559439900	6	0.003
1559440800	2	0.024
1559440800	3	0.049
1559440800	6	0.002
1559441700	2	0.032
1559441700	3	0.049
1559441700	6	0.002
1559442600	2	0.024
1559442600	3	0.049
1559442600	6	0.003
1559443500	2	0.016
1559443500	3	0.049
1559443500	6	0.002
1559444400	2	0.014
1559444400	3	0.049
1559444400	6	0.002
1559445300	2	0.022
1559445300	3	0.05
1559445300	6	0.003
1559446200	2	0.022
1559446200	3	0.05
1559446200	6	0.002
1559447100	2	0.009
1559447100	3	0.049
1559447100	6	0.003
1559448000	2	0.022
1559448000	3	0.048
1559448000	6	0.002
1559448900	2	0.022
1559448900	3	0.049
1559448900	6	0.002
1559449800	2	0.014
1559449800	3	0.049
1559449800	6	0.003
1559450700	2	0.016
1559450700	3	0.049
1559450700	6	0.002
1559451600	2	0.022
1559451600	3	0.048
1559451600	6	0.002
1559452500	2	0.019
1559452500	3	0.048
1559452500	6	0.003
1559453400	2	0.011
1559453400	3	0.049
1559453400	6	0.002
1559454300	2	0.024
1559454300	3	0.049
1559454300	6	0.002
1559455200	2	0.026
1559455200	3	0.049
1559455200	6	0.003
1559456100	2	0.043
1559456100	3	0.049
1559456100	6	0.002
1559457000	2	0.039
1559457000	3	0.05
1559457000	6	0.003
1559457900	2	0.034
1559457900	3	0.049
1559457900	6	0.002
1559458800	2	0.043
1559458800	3	0.048
1559458800	6	0.002
1559459700	2	0.037
1559459700	3	0.049
1559459700	6	0.003
1559460600	2	0.017
1559460600	3	0.049
1559460600	6	0.002
1559461500	2	0.018
1559461500	3	0.049
1559461500	6	0.002
1559462400	2	0.025
1559462400	3	0.049
1559462400	6	0.003
1559463300	2	0.023
1559463300	3	0.049
1559463300	6	0.002
1559464200	2	0.011
1559464200	3	0.049
1559464200	6	0.002
1559465100	2	0.021
1559465100	3	0.049
1559465100	6	0.003
1559466000	2	0.026
1559466000	3	0.05
1559466000	6	0.002
1559466900	2	0.016
1559466900	3	0.049
1559466900	6	0.003
1559467800	2	0.015
1559467800	3	0.049
1559467800	6	0.002
1559468700	2	0.022
1559468700	3	0.048
1559468700	6	0.002
1559469600	2	0.022
1559469600	3	0.049
1559469600	6	0.042
1559470500	2	0.01
1559470500	3	0.048
1559470500	6	0.043
1559471400	2	0.021
1559471400	3	0.049
1559471400	6	0.041
1559472300	2	0.022
1559472300	3	0.024
1559472300	6	0.039
1559473200	2	0.014
1559473200	3	0.0
1559473200	6	0.016
1559474100	2	0.016
1559474100	3	0.0
1559474100	6	0.005
1559475000	2	0.026
1559475000	3	0.0
1559475000	6	0.027
1559475900	2	0.021
1559475900	3	0.0
1559475900	6	0.006
1559476800	2	0.06
1559476800	3	0.0
1559476800	6	0.007
1559477700	2	0.024
1559477700	3	0.0
1559477700	6	0.006
1559478600	2	0.023
1559478600	3	0.0
1559478600	6	0.002
1559479500	2	0.009
1559479500	3	0.0
1559479500	6	0.005
1559480400	2	0.022
1559480400	3	0.0
1559480400	6	0.003
1559481300	2	0.022
1559481300	3	0.0
1559481300	6	0.003
1559482200	2	0.014
1559482200	3	0.0
1559482200	6	0.012
1559483100	2	0.018
1559483100	3	0.0
1559483100	6	0.032
1559484000	2	0.022
1559484000	3	0.0
1559484000	6	0.016
1559484900	2	0.018
1559484900	3	0.0
1559484900	6	0.028
1559485800	2	0.012
1559485800	3	0.0
1559485800	6	0.034
1559486700	2	0.036
1559486700	3	0.0
1559486700	6	0.028
1559487600	2	0.05
1559487600	3	0.0
1559487600	6	0.01
1559488500	2	0.036
1559488500	3	0.0
1559488500	6	0.034
1559489400	2	0.05
1559489400	3	0.0
1559489400	6	0.033
1559490300	2	0.05
1559490300	3	0.0
1559490300	6	0.058
1559491200	2	0.039
1559491200	3	0.0
1559491200	6	0.042
1559492100	2	0.046
1559492100	3	0.0
1559492100	6	0.036
1559493000	2	0.049
1559493000	3	0.0
1559493000	6	0.03
1559493900	2	0.044
1559493900	3	0.0
1559493900	6	0.025
1559494800	2	0.041
1559494800	3	0.0
1559494800	6	0.004
1559495700	2	0.052
1559495700	3	0.0
1559495700	6	0.036
1559496600	2	0.049
1559496600	3	0.0
1559496600	6	0.048
1559497500	2	0.036
1559497500	3	0.0
1559497500	6	0.046
1559498400	2	0.049
1559498400	3	0.0
1559498400	6	0.031
1559499300	2	0.05
1559499300	3	0.0
1559499300	6	0.003
1559500200	2	0.041
1559500200	3	0.0
1559500200	6	0.003
1559501100	2	0.057
1559501100	3	0.0
1559501100	6	0.002
1559502000	2	0.054
1559502000	3	0.0
1559502000	6	0.003
1559502900	2	0.046
1559502900	3	0.0
1559502900	6	0.003
1559503800	2	0.038
1559503800	3	0.0
1559503800	6	0.002
1559504700	2	0.049
1559504700	3	0.0
1559504700	6	0.003
1559505600	2	0.049
1559505600	3	0.0
1559505600	6	0.014
1559506500	2	0.04
1559506500	3	0.0
1559506500	6	0.037
1559507400	2	0.049
1559507400	3	0.0
1559507400	6	0.077
1559508300	2	0.05
1559508300	3	0.0
1559508300	6	0.055
1559509200	2	0.04
1559509200	3	0.04
1559509200	6	0.071
1559510100	2	0.048
1559510100	3	0.048
1559510100	6	0.035
1559511000	2	0.055
1559511000	3	0.047
1559511000	6	0.027
1559511900	2	0.049
1559511900	3	0.047
1559511900	6	0.015
1559512800	2	0.044
1559512800	3	0.048
1559512800	6	0.016
1559513700	2	0.054
1559513700	3	0.048
1559513700	6	0.016
1559514600	2	0.057
1559514600	3	0.048
1559514600	6	0.022
1559515500	2	0.026
1559515500	3	0.047
1559515500	6	0.014
1559516400	2	0.038
1559516400	3	0.048
1559516400	6	0.018
1559517300	2	0.038
1559517300	3	0.048
1559517300	6	0.012
1559518200	2	0.025
1559518200	3	0.048
1559518200	6	0.011
1559519100	2	0.033
1559519100	3	0.048
1559519100	6	0.012
1559520000	2	0.036
1559520000	3	0.048
1559520000	6	0.053
1559520900	2	0.031
1559520900	3	0.047
1559520900	6	0.05
1559521800	2	0.028
1559521800	3	0.047
1559521800	6	0.048
1559522700	2	0.036
1559522700	3	0.048
1559522700	6	0.02
1559523600	2	0.035
1559523600	3	0.047
1559523600	6	0.011
1559524500	2	0.022
1559524500	3	0.047
1559524500	6	0.011
1559525400	2	0.036
1559525400	3	0.047
1559525400	6	0.012
1559526300	2	0.036
1559526300	3	0.048
1559526300	6	0.003
1559527200	2	0.027
1559527200	3	0.046
1559527200	6	0.003
1559528100	2	0.031
1559528100	3	0.048
1559528100	6	0.034
1559529000	2	0.033
1559529000	3	0.048
1559529000	6	0.041
1559529900	2	0.018
1559529900	3	0.048
1559529900	6	0.04
1559530800	2	0.013
1559530800	3	0.048
1559530800	6	0.039
1559531700	2	0.022
1559531700	3	0.048
1559531700	6	0.039
1559532600	2	0.023
1559532600	3	0.049
1559532600	6	0.02
1559533500	2	0.009
1559533500	3	0.049
1559533500	6	0.003
1559534400	2	0.022
1559534400	3	0.049
1559534400	6	0.002
1559535300	2	0.022
1559535300	3	0.05
1559535300	6	0.003
1559536200	2	0.013
1559536200	3	0.049
1559536200	6	0.002
1559537100	2	0.017
1559537100	3	0.049
1559537100	6	0.003
1559538000	2	0.022
1559538000	3	0.049
1559538000	6	0.002
1559538900	2	0.02
1559538900	3	0.05
1559538900	6	0.01
1559539800	2	0.013
1559539800	3	0.05
1559539800	6	0.042
1559540700	2	0.022
1559540700	3	0.049
1559540700	6	0.039
1559541600	2	0.022
1559541600	3	0.049
1559541600	6	0.039
1559542500	2	0.043
1559542500	3	0.05
1559542500	6	0.016
1559543400	2	0.036
1559543400	3	0.05
1559543400	6	0.003
1559544300	2	0.037
1559544300	3	0.05
1559544300	6	0.002
1559545200	2	0.043
1559545200	3	0.051
1559545200	6	0.003
1559546100	2	0.036
1559546100	3	0.05
1559546100	6	0.002
1559547000	2	0.018
1559547000	3	0.05
1559547000	6	0.003
1559547900	2	0.016
1559547900	3	0.049
1559547900	6	0.002
1559548800	2	0.025
1559548800	3	0.048
1559548800	6	0.003
1559549700	2	0.024
1559549700	3	0.048
1559549700	6	0.002
1559550600	2	0.011
1559550600	3	0.048
1559550600	6	0.003
1559551500	2	0.021
1559551500	3	0.048
1559551500	6	0.002
1559552400	2	0.023
1559552400	3	0.048
1559552400	6	0.003
1559553300	2	0.016
1559553300	3	0.048
1559553300	6	0.002
1559554200	2	0.015
1559554200	3	0.047
1559554200	6	0.003
1559555100	2	0.022
1559555100	3	0.047
1559555100	6	0.013
1559556000	2	0.021
1559556000	3	0.047
1559556000	6	0.043
1559556900	2	0.012
1559556900	3	0.048
1559556900	6	0.04
1559557800	2	0.023
1559557800	3	0.047
1559557800	6	0.039
1559558700	2	0.022
1559558700	3	0.032
1559558700	6	0.021
1559559600	2	0.012
1559559600	3	0.001
1559559600	6	0.029
1559560500	2	0.059
1559560500	3	0.0
1559560500	6	0.018
1559561400	2	0.031
1559561400	3	0.0
1559561400	6	0.018
1559562300	2	0.028
1559562300	3	0.0
1559562300	6	0.021
1559563200	2	0.054
1559563200	3	0.0
1559563200	6	0.021
1559564100	2	0.071
1559564100	3	0.0
1559564100	6	0.011
1559565000	2	0.073
1559565000	3	0.0
1559565000	6	0.021
1559565900	2	0.081
1559565900	3	0.0
1559565900	6	0.003
1559566800	2	0.025
1559566800	3	0.0
1559566800	6	0.003
1559567700	2	0.02
1559567700	3	0.0
1559567700	6	0.003
1559568600	2	0.011
1559568600	3	0.0
1559568600	6	0.01
1559569500	2	0.022
1559569500	3	0.0
1559569500	6	0.009
1559570400	2	0.022
1559570400	3	0.0
1559570400	6	0.019
1559571300	2	0.009
1559571300	3	0.0
1559571300	6	0.029
1559572200	2	0.022
1559572200	3	0.0
1559572200	6	0.028
1559573100	2	0.042
1559573100	3	0.0
1559573100	6	0.007
1559574000	2	0.04
1559574000	3	0.0
1559574000	6	0.024
1559574900	2	0.051
1559574900	3	0.0
1559574900	6	0.046
1559575800	2	0.053
1559575800	3	0.0
1559575800	6	0.042
1559576700	2	0.038
1559576700	3	0.0
1559576700	6	0.04
1559577600	2	0.049
1559577600	3	0.0
1559577600	6	0.039
1559578500	2	0.05
1559578500	3	0.0
1559578500	6	0.038
1559579400	2	0.038
1559579400	3	0.0
1559579400	6	0.023
1559580300	2	0.046
1559580300	3	0.0
1559580300	6	0.002
1559581200	2	0.049
1559581200	3	0.0
1559581200	6	0.002
1559582100	2	0.042
1559582100	3	0.0
1559582100	6	0.002
1559583000	2	0.042
1559583000	3	0.0
1559583000	6	0.003
1559583900	2	0.049
1559583900	3	0.0
1559583900	6	0.002
1559584800	2	0.025
1559584800	3	0.0
1559584800	6	0.002
1559585700	2	0.009
1559585700	3	0.0
1559585700	6	0.002
1559586600	2	0.022
1559586600	3	0.0
1559586600	6	0.002
1559587500	2	0.022
1559587500	3	0.0
1559587500	6	0.002
1559588400	2	0.013
1559588400	3	0.0
1559588400	6	0.002
1559589300	2	0.017
1559589300	3	0.0
1559589300	6	0.002
1559590200	2	0.023
1559590200	3	0.0
1559590200	6	0.002
1559591100	2	0.018
1559591100	3	0.0
1559591100	6	0.003
1559592000	2	0.012
1559592000	3	0.0
1559592000	6	0.002
1559592900	2	0.022
1559592900	3	0.0
1559592900	6	0.029
1559593800	2	0.059
1559593800	3	0.0
1559593800	6	0.067
1559594700	2	0.041
1559594700	3	0.006
1559594700	6	0.065
1559595600	2	0.048
1559595600	3	0.038
1559595600	6	0.067
1559596500	2	0.049
1559596500	3	0.047
1559596500	6	0.07
1559597400	2	0.043
1559597400	3	0.048
1559597400	6	0.036
1559598300	2	0.041
1559598300	3	0.047
1559598300	6	0.035
1559599200	2	0.049
1559599200	3	0.047
1559599200	6	0.088
1559600100	2	0.05
1559600100	3	0.047
1559600100	6	0.097
1559601000	2	0.043
1559601000	3	0.047
1559601000	6	0.091
1559601900	2	0.055
1559601900	3	0.048
1559601900	6	0.075
1559602800	2	0.091
1559602800	3	0.047
1559602800	6	0.018
1559603700	2	0.027
1559603700	3	0.048
1559603700	6	0.018
1559604600	2	0.031
1559604600	3	0.047
1559604600	6	0.015
1559605500	2	0.035
1559605500	3	0.048
1559605500	6	0.012
1559606400	2	0.033
1559606400	3	0.048
1559606400	6	0.012
1559607300	2	0.024
1559607300	3	0.048
1559607300	6	0.012
1559608200	2	0.036
1559608200	3	0.048
1559608200	6	0.011
1559609100	2	0.035
1559609100	3	0.048
1559609100	6	0.012
1559610000	2	0.026
1559610000	3	0.049
1559610000	6	0.014
1559610900	2	0.032
1559610900	3	0.048
1559610900	6	0.011
1559611800	2	0.036
1559611800	3	0.049
1559611800	6	0.012
1559612700	2	0.031
1559612700	3	0.05
1559612700	6	0.002
1559613600	2	0.026
1559613600	3	0.049
1559613600	6	0.003
1559614500	2	0.036
1559614500	3	0.049
1559614500	6	0.002
1559615400	2	0.036
1559615400	3	0.049
1559615400	6	0.004
1559616300	2	0.023
1559616300	3	0.05
1559616300	6	0.002
1559617200	2	0.035
1559617200	3	0.05
1559617200	6	0.003
1559618100	2	0.036
1559618100	3	0.049
1559618100	6	0.002
1559619000	2	0.02
1559619000	3	0.05
1559619000	6	0.003
1559619900	2	0.016
1559619900	3	0.05
1559619900	6	0.003
1559620800	2	0.022
1559620800	3	0.049
1559620800	6	0.002
1559621700	2	0.018
1559621700	3	0.049
1559621700	6	0.003
1559622600	2	0.012
1559622600	3	0.048
1559622600	6	0.002
1559623500	2	0.022
1559623500	3	0.049
1559623500	6	0.003
1559624400	2	0.022
1559624400	3	0.048
1559624400	6	0.003
1559625300	2	0.009
1559625300	3	0.048
1559625300	6	0.002
1559626200	2	0.02
1559626200	3	0.049
1559626200	6	0.003
1559627100	2	0.029
1559627100	3	0.048
1559627100	6	0.002
1559628000	2	0.043
1559628000	3	0.047
1559628000	6	0.003
1559628900	2	0.027
1559628900	3	0.048
1559628900	6	0.002
1559629800	2	0.046
1559629800	3	0.048
1559629800	6	0.003
1559630700	2	0.041
1559630700	3	0.048
1559630700	6	0.003
1559631600	2	0.023
1559631600	3	0.047
1559631600	6	0.002
1559632500	2	0.025
1559632500	3	0.048
1559632500	6	0.003
1559633400	2	0.019
1559633400	3	0.048
1559633400	6	0.002
1559634300	2	0.016
1559634300	3	0.047
1559634300	6	0.003
1559635200	2	0.024
1559635200	3	0.048
1559635200	6	0.002
1559636100	2	0.023
1559636100	3	0.047
1559636100	6	0.003
1559637000	2	0.011
1559637000	3	0.048
1559637000	6	0.008
1559637900	2	0.019
1559637900	3	0.048
1559637900	6	0.045
1559638800	2	0.022
1559638800	3	0.049
1559638800	6	0.043
1559639700	2	0.016
1559639700	3	0.049
1559639700	6	0.042
1559640600	2	0.014
1559640600	3	0.048
1559640600	6	0.04
1559641500	2	0.021
1559641500	3	0.048
1559641500	6	0.03
1559642400	2	0.021
1559642400	3	0.048
1559642400	6	0.003
1559643300	2	0.009
1559643300	3	0.047
1559643300	6	0.002
1559644200	2	0.022
1559644200	3	0.046
1559644200	6	0.003
1559645100	2	0.022
1559645100	3	0.005
1559645100	6	0.023
1559646000	2	0.01
1559646000	3	0.001
1559646000	6	0.029
1559646900	2	0.019
1559646900	3	0.0
1559646900	6	0.029
1559647800	2	0.07
1559647800	3	0.0
1559647800	6	0.02
1559648700	2	0.015
1559648700	3	0.0
1559648700	6	0.151
1559649600	2	0.017
1559649600	3	0.0
1559649600	6	0.078
1559650500	2	0.022
1559650500	3	0.0
1559650500	6	0.039
1559651400	2	0.017
1559651400	3	0.0
1559651400	6	0.045
1559652300	2	0.014
1559652300	3	0.0
1559652300	6	0.051
1559653200	2	0.023
1559653200	3	0.0
1559653200	6	0.05
1559654100	2	0.019
1559654100	3	0.0
1559654100	6	0.057
1559655000	2	0.011
1559655000	3	0.0
1559655000	6	0.04
1559655900	2	0.022
1559655900	3	0.0
1559655900	6	0.024
1559656800	2	0.022
1559656800	3	0.0
1559656800	6	0.017
1559657700	2	0.009
1559657700	3	0.0
1559657700	6	0.004
1559658600	2	0.021
1559658600	3	0.0
1559658600	6	0.003
1559659500	2	0.022
1559659500	3	0.0
1559659500	6	0.002
1559660400	2	0.012
1559660400	3	0.0
1559660400	6	0.003
1559661300	2	0.02
1559661300	3	0.0
1559661300	6	0.003
1559662200	2	0.197
1559662200	3	0.0
1559662200	6	0.006
1559663100	2	0.274
1559663100	3	0.0
1559663100	6	0.006
1559664000	2	0.224
1559664000	3	0.0
1559664000	6	0.002
1559664900	2	0.215
1559664900	3	0.0
1559664900	6	0.002
1559665800	2	0.149
1559665800	3	0.0
1559665800	6	0.002
1559666700	2	0.048
1559666700	3	0.0
1559666700	6	0.003
1559667600	2	0.036
1559667600	3	0.0
1559667600	6	0.002
1559668500	2	0.049
1559668500	3	0.0
1559668500	6	0.002
1559669400	2	0.05
1559669400	3	0.0
1559669400	6	0.002
1559670300	2	0.043
1559670300	3	0.0
1559670300	6	0.002
1559671200	2	0.02
1559671200	3	0.0
1559671200	6	0.002
1559672100	2	0.022
1559672100	3	0.0
1559672100	6	0.002
1559673000	2	0.022
1559673000	3	0.0
1559673000	6	0.002
1559673900	2	0.011
1559673900	3	0.0
1559673900	6	0.004
1559674800	2	0.018
1559674800	3	0.0
1559674800	6	0.044
1559675700	2	0.021
1559675700	3	0.0
1559675700	6	0.043
1559676600	2	0.018
1559676600	3	0.0
1559676600	6	0.041
1559677500	2	0.011
1559677500	3	0.0
1559677500	6	0.039
1559678400	2	0.022
1559678400	3	0.0
1559678400	6	0.028
1559679300	2	0.021
1559679300	3	0.0
1559679300	6	0.028
1559680200	2	0.018
1559680200	3	0.0
1559680200	6	0.012
1559681100	2	0.049
1559681100	3	0.003
1559681100	6	0.014
1559682000	2	0.049
1559682000	3	0.041
1559682000	6	0.061
1559682900	2	0.046
1559682900	3	0.048
1559682900	6	0.091
1559683800	2	0.041
1559683800	3	0.048
1559683800	6	0.075
1559684700	2	0.048
1559684700	3	0.048
1559684700	6	0.04
1559685600	2	0.048
1559685600	3	0.048
1559685600	6	0.038
1559686500	2	0.039
1559686500	3	0.047
1559686500	6	0.045
1559687400	2	0.049
1559687400	3	0.047
1559687400	6	0.045
1559688300	2	0.11
1559688300	3	0.048
1559688300	6	0.03
1559689200	2	0.031
1559689200	3	0.047
1559689200	6	0.026
1559690100	2	0.035
1559690100	3	0.047
1559690100	6	0.034
1559691000	2	0.024
1559691000	3	0.046
1559691000	6	0.044
1559691900	2	0.034
1559691900	3	0.047
1559691900	6	0.034
1559692800	2	0.036
1559692800	3	0.046
1559692800	6	0.059
1559693700	2	0.029
1559693700	3	0.046
1559693700	6	0.058
1559694600	2	0.027
1559694600	3	0.047
1559694600	6	0.054
1559695500	2	0.035
1559695500	3	0.046
1559695500	6	0.019
1559696400	2	0.035
1559696400	3	0.046
1559696400	6	0.012
1559697300	2	0.022
1559697300	3	0.048
1559697300	6	0.012
1559698200	2	0.035
1559698200	3	0.047
1559698200	6	0.012
1559699100	2	0.038
1559699100	3	0.048
1559699100	6	0.011
1559700000	2	0.029
1559700000	3	0.047
1559700000	6	0.01
1559700900	2	0.028
1559700900	3	0.047
1559700900	6	0.003
1559701800	2	0.036
1559701800	3	0.046
1559701800	6	0.002
1559702700	2	0.034
1559702700	3	0.046
1559702700	6	0.003
1559703600	2	0.023
1559703600	3	0.046
1559703600	6	0.002
1559704500	2	0.035
1559704500	3	0.046
1559704500	6	0.01
1559705400	2	0.035
1559705400	3	0.046
1559705400	6	0.043
1559706300	2	0.021
1559706300	3	0.047
1559706300	6	0.04
1559707200	2	0.017
1559707200	3	0.046
1559707200	6	0.022
1559708100	2	0.021
1559708100	3	0.047
1559708100	6	0.002
1559709000	2	0.018
1559709000	3	0.047
1559709000	6	0.003
1559709900	2	0.012
1559709900	3	0.047
1559709900	6	0.002
1559710800	2	0.022
1559710800	3	0.047
1559710800	6	0.004
1559711700	2	0.021
1559711700	3	0.048
1559711700	6	0.002
1559712600	2	0.008
1559712600	3	0.048
1559712600	6	0.003
1559713500	2	0.021
1559713500	3	0.047
1559713500	6	0.002
1559714400	2	0.021
1559714400	3	0.047
1559714400	6	0.002
1559715300	2	0.012
1559715300	3	0.047
1559715300	6	0.003
1559716200	2	0.042
1559716200	3	0.048
1559716200	6	0.002
1559717100	2	0.043
1559717100	3	0.047
1559717100	6	0.003
1559718000	2	0.027
1559718000	3	0.048
1559718000	6	0.002
1559718900	2	0.046
1559718900	3	0.048
1559718900	6	0.003
1559719800	2	0.041
1559719800	3	0.048
1559719800	6	0.002
1559720700	2	0.017
1559720700	3	0.047
1559720700	6	0.003
1559721600	2	0.025
1559721600	3	0.048
1559721600	6	0.002
1559722500	2	0.024
1559722500	3	0.047
1559722500	6	0.003
1559723400	2	0.012
1559723400	3	0.047
1559723400	6	0.002
1559724300	2	0.018
1559724300	3	0.046
1559724300	6	0.003
1559725200	2	0.023
1559725200	3	0.047
1559725200	6	0.002
1559726100	2	0.019
1559726100	3	0.047
1559726100	6	0.002
1559727000	2	0.013
1559727000	3	0.046
1559727000	6	0.003
1559727900	2	0.022
1559727900	3	0.046
1559727900	6	0.002
1559728800	2	0.022
1559728800	3	0.047
1559728800	6	0.003
1559729700	2	0.012
1559729700	3	0.045
1559729700	6	0.002
1559730600	2	0.018
1559730600	3	0.045
1559730600	6	0.03
1559731500	2	0.021
1559731500	3	0.034
1559731500	6	0.043
1559732400	2	0.016
1559732400	3	0.015
1559732400	6	0.062
1559733300	2	0.013
1559733300	3	0.0
1559733300	6	0.054
1559734200	2	0.069
1559734200	3	0.0
1559734200	6	0.015
1559735100	2	0.021
1559735100	3	0.0
1559735100	6	0.022
1559736000	2	0.011
1559736000	3	0.0
1559736000	6	0.022
1559736900	2	0.023
1559736900	3	0.0
1559736900	6	0.023
1559737800	2	0.022
1559737800	3	0.0
1559737800	6	0.023
1559738700	2	0.01
1559738700	3	0.0
1559738700	6	0.041
1559739600	2	0.02
1559739600	3	0.0
1559739600	6	0.022
1559740500	2	0.022
1559740500	3	0.0
1559740500	6	0.023
1559741400	2	0.015
1559741400	3	0.0
1559741400	6	0.023
1559742300	2	0.018
1559742300	3	0.0
1559742300	6	0.022
1559743200	2	0.027
1559743200	3	0.0
1559743200	6	0.025
1559744100	2	0.013
1559744100	3	0.0
1559744100	6	0.34
1559745000	2	0.018
1559745000	3	0.0
1559745000	6	0.01
1559745900	2	0.023
1559745900	3	0.0
1559745900	6	0.044
1559746800	2	0.017
1559746800	3	0.0
1559746800	6	0.041
1559747700	2	0.032
1559747700	3	0.0
1559747700	6	0.041
1559748600	2	0.054
1559748600	3	0.0
1559748600	6	0.047
1559749500	2	0.047
1559749500	3	0.0
1559749500	6	0.051
1559750400	2	0.041
1559750400	3	0.0
1559750400	6	0.043
1559751300	2	0.051
1559751300	3	0.0
1559751300	6	0.039
1559752200	2	0.051
1559752200	3	0.0
1559752200	6	0.037
1559753100	2	0.039
1559753100	3	0.0
1559753100	6	0.038
1559754000	2	0.047
1559754000	3	0.0
1559754000	6	0.034
1559754900	2	0.05
1559754900	3	0.0
1559754900	6	0.002
1559755800	2	0.046
1559755800	3	0.0
1559755800	6	0.003
1559756700	2	0.04
1559756700	3	0.0
1559756700	6	0.002
1559757600	2	0.05
1559757600	3	0.0
1559757600	6	0.002
1559758500	2	0.026
1559758500	3	0.0
1559758500	6	0.002
1559759400	2	0.011
1559759400	3	0.0
1559759400	6	0.002
1559760300	2	0.02
1559760300	3	0.0
1559760300	6	0.002
1559761200	2	0.023
1559761200	3	0.0
1559761200	6	0.002
1559762100	2	0.017
1559762100	3	0.0
1559762100	6	0.002
1559763000	2	0.014
1559763000	3	0.0
1559763000	6	0.002
1559763900	2	0.023
1559763900	3	0.0
1559763900	6	0.003
1559764800	2	0.022
1559764800	3	0.0
1559764800	6	0.002
1559765700	2	0.021
1559765700	3	0.0
1559765700	6	0.002
1559766600	2	0.026
1559766600	3	0.0
1559766600	6	0.002
1559767500	2	0.1
1559767500	3	0.013
1559767500	6	0.002
1559768400	2	0.051
1559768400	3	0.047
1559768400	6	0.003
1559769300	2	0.042
1559769300	3	0.049
1559769300	6	0.026
1559770200	2	0.047
1559770200	3	0.048
1559770200	6	0.028
1559771100	2	0.05
1559771100	3	0.047
1559771100	6	0.025
1559772000	2	0.044
1559772000	3	0.048
1559772000	6	0.025
1559772900	2	0.041
1559772900	3	0.047
1559772900	6	0.049
1559773800	2	0.053
1559773800	3	0.047
1559773800	6	0.061
1559774700	2	0.116
1559774700	3	0.046
1559774700	6	0.079
1559775600	2	0.24
1559775600	3	0.047
1559775600	6	0.058
1559776500	2	0.293
1559776500	3	0.047
1559776500	6	0.035
1559777400	2	0.3
1559777400	3	0.046
1559777400	6	0.065
1559778300	2	0.238
1559778300	3	0.046
1559778300	6	0.066
1559779200	2	0.202
1559779200	3	0.045
1559779200	6	0.056
1559780100	2	0.222
1559780100	3	0.046
1559780100	6	0.054
1559781000	2	0.238
1559781000	3	0.045
1559781000	6	0.055
1559781900	2	0.226
1559781900	3	0.046
1559781900	6	0.022
1559782800	2	0.186
1559782800	3	0.045
1559782800	6	0.022
1559783700	2	0.236
1559783700	3	0.046
1559783700	6	0.028
1559784600	2	0.183
1559784600	3	0.045
1559784600	6	0.002
1559785500	2	0.226
1559785500	3	0.046
1559785500	6	0.002
1559786400	2	0.203
1559786400	3	0.046
1559786400	6	0.003
1559787300	2	0.221
1559787300	3	0.046
1559787300	6	0.002
1559788200	2	0.077
1559788200	3	0.046
1559788200	6	0.002
1559789100	2	0.029
1559789100	3	0.046
1559789100	6	0.004
1559790000	2	0.035
1559790000	3	0.047
1559790000	6	0.021
1559790900	2	0.035
1559790900	3	0.046
1559790900	6	0.012
1559791800	2	0.022
1559791800	3	0.046
1559791800	6	0.012
1559792700	2	0.024
1559792700	3	0.046
1559792700	6	0.012
1559793600	2	0.022
1559793600	3	0.047
1559793600	6	0.011
1559794500	2	0.015
1559794500	3	0.047
1559794500	6	0.013
1559795400	2	0.014
1559795400	3	0.046
1559795400	6	0.008
1559796300	2	0.022
1559796300	3	0.047
1559796300	6	0.003
1559797200	2	0.021
1559797200	3	0.046
1559797200	6	0.003
1559798100	2	0.01
1559798100	3	0.047
1559798100	6	0.003
1559799000	2	0.021
1559799000	3	0.047
1559799000	6	0.003
1559799900	2	0.021
1559799900	3	0.047
1559799900	6	0.003
1559800800	2	0.015
1559800800	3	0.047
1559800800	6	0.003
1559801700	2	0.042
1559801700	3	0.047
1559801700	6	0.003
1559802600	2	0.042
1559802600	3	0.047
1559802600	6	0.003
1559803500	2	0.028
1559803500	3	0.047
1559803500	6	0.002
1559804400	2	0.045
1559804400	3	0.047
1559804400	6	0.003
1559805300	2	0.041
1559805300	3	0.047
1559805300	6	0.003
1559806200	2	0.019
1559806200	3	0.047
1559806200	6	0.003
1559807100	2	0.027
1559807100	3	0.047
1559807100	6	0.002
1559808000	2	0.021
1559808000	3	0.047
1559808000	6	0.003
1559808900	2	0.012
1559808900	3	0.048
1559808900	6	0.002
1559809800	2	0.024
1559809800	3	0.047
1559809800	6	0.003
1559810700	2	0.023
1559810700	3	0.047
1559810700	6	0.002
1559811600	2	0.015
1559811600	3	0.047
1559811600	6	0.003
1559812500	2	0.016
1559812500	3	0.048
1559812500	6	0.002
1559813400	2	0.022
1559813400	3	0.047
1559813400	6	0.002
1559814300	2	0.134
1559814300	3	0.047
1559814300	6	0.003
1559815200	2	0.188
1559815200	3	0.047
1559815200	6	0.003
1559816100	2	0.199
1559816100	3	0.047
1559816100	6	0.003
1559817000	2	0.198
1559817000	3	0.047
1559817000	6	0.012
1559817900	2	0.188
1559817900	3	0.043
1559817900	6	0.045
1559818800	2	0.191
1559818800	3	0.016
1559818800	6	0.043
1559819700	2	0.198
1559819700	3	0.0
1559819700	6	0.038
1559820600	2	0.195
1559820600	3	0.0
1559820600	6	0.02
1559821500	2	0.234
1559821500	3	0.0
1559821500	6	0.061
1559822400	2	0.2
1559822400	3	0.0
1559822400	6	0.03
1559823300	2	0.198
1559823300	3	0.0
1559823300	6	0.055
1559824200	2	0.186
1559824200	3	0.0
1559824200	6	0.058
1559825100	2	0.048
1559825100	3	0.0
1559825100	6	0.057
1559826000	2	0.023
1559826000	3	0.0
1559826000	6	0.047
1559826900	2	0.016
1559826900	3	0.0
1559826900	6	0.022
1559827800	2	0.014
1559827800	3	0.0
1559827800	6	0.023
1559828700	2	0.022
1559828700	3	0.0
1559828700	6	0.023
1559829600	2	0.058
1559829600	3	0.0
1559829600	6	0.023
1559830500	2	0.046
1559830500	3	0.0
1559830500	6	0.022
1559831400	2	0.068
1559831400	3	0.0
1559831400	6	0.023
1559832300	2	0.073
1559832300	3	0.0
1559832300	6	0.022
1559833200	2	0.069
1559833200	3	0.0
1559833200	6	0.012
1559834100	2	0.016
1559834100	3	0.0
1559834100	6	0.003
1559835000	2	0.022
1559835000	3	0.0
1559835000	6	0.004
1559835900	2	0.045
1559835900	3	0.0
1559835900	6	0.009
1559836800	2	0.043
1559836800	3	0.0
1559836800	6	0.005
1559837700	2	0.05
1559837700	3	0.0
1559837700	6	0.005
1559838600	2	0.05
1559838600	3	0.0
1559838600	6	0.004
1559839500	2	0.041
1559839500	3	0.0
1559839500	6	0.008
1559840400	2	0.011
1559840400	3	0.0
1559840400	6	0.036
1559841300	2	0.088
1559841300	3	0.0
1559841300	6	0.044
1559842200	2	0.024
1559842200	3	0.0
1559842200	6	0.042
1559843100	2	0.016
1559843100	3	0.0
1559843100	6	0.041
1559844000	2	0.03
1559844000	3	0.0
1559844000	6	0.009
1559844900	2	0.075
1559844900	3	0.0
1559844900	6	0.004
1559845800	2	0.03
1559845800	3	0.0
1559845800	6	0.044
1559846700	2	0.031
1559846700	3	0.0
1559846700	6	0.049
1559847600	2	0.037
1559847600	3	0.0
1559847600	6	0.046
1559848500	2	0.023
1559848500	3	0.0
1559848500	6	0.01
1559849400	2	0.018
1559849400	3	0.0
1559849400	6	0.001
1559850300	2	0.015
1559850300	3	0.0
1559850300	6	0.001
1559851200	2	0.022
1559851200	3	0.0
1559851200	6	0.005
1559852100	2	0.031
1559852100	3	0.0
1559852100	6	0.042
1559853000	2	0.012
1559853000	3	0.0
1559853000	6	0.14
1559853900	2	0.044
1559853900	3	0.022
1559853900	6	0.069
1559854800	2	0.051
1559854800	3	0.049
1559854800	6	0.057
1559855700	2	0.041
1559855700	3	0.048
1559855700	6	0.059
1559856600	2	0.052
1559856600	3	0.047
1559856600	6	0.035
1559857500	2	0.053
1559857500	3	0.048
1559857500	6	0.062
1559858400	2	0.05
1559858400	3	0.048
1559858400	6	0.075
1559859300	2	0.042
1559859300	3	0.047
1559859300	6	0.074
1559860200	2	0.054
1559860200	3	0.047
1559860200	6	0.072
1559861100	2	0.053
1559861100	3	0.047
1559861100	6	0.077
1559862000	2	0.038
1559862000	3	0.048
1559862000	6	0.074
1559862900	2	0.027
1559862900	3	0.047
1559862900	6	0.07
1559863800	2	0.038
1559863800	3	0.047
1559863800	6	0.06
1559864700	2	0.033
1559864700	3	0.046
1559864700	6	0.038
1559865600	2	0.025
1559865600	3	0.047
1559865600	6	0.038
1559866500	2	0.037
1559866500	3	0.046
1559866500	6	0.031
1559867400	2	0.036
1559867400	3	0.047
1559867400	6	0.018
1559868300	2	0.026
1559868300	3	0.047
1559868300	6	0.017
1559869200	2	0.032
1559869200	3	0.046
1559869200	6	0.012
1559870100	2	0.037
1559870100	3	0.047
1559870100	6	0.012
1559871000	2	0.032
1559871000	3	0.046
1559871000	6	0.012
1559871900	2	0.026
1559871900	3	0.046
1559871900	6	0.013
1559872800	2	0.037
1559872800	3	0.047
1559872800	6	0.011
1559873700	2	0.037
1559873700	3	0.047
1559873700	6	0.012
1559874600	2	0.025
1559874600	3	0.048
1559874600	6	0.003
1559875500	2	0.033
1559875500	3	0.049
1559875500	6	0.002
1559876400	2	0.036
1559876400	3	0.05
1559876400	6	0.003
1559877300	2	0.031
1559877300	3	0.049
1559877300	6	0.003
1559878200	2	0.022
1559878200	3	0.049
1559878200	6	0.004
1559879100	2	0.025
1559879100	3	0.049
1559879100	6	0.003
1559880000	2	0.022
1559880000	3	0.049
1559880000	6	0.002
1559880900	2	0.01
1559880900	3	0.05
1559880900	6	0.003
1559881800	2	0.021
1559881800	3	0.049
1559881800	6	0.003
1559882700	2	0.022
1559882700	3	0.048
1559882700	6	0.002
1559883600	2	0.017
1559883600	3	0.048
1559883600	6	0.003
1559884500	2	0.042
1559884500	3	0.049
1559884500	6	0.003
1559885400	2	0.039
1559885400	3	0.05
1559885400	6	0.003
1559886300	2	0.033
1559886300	3	0.049
1559886300	6	0.002
1559887200	2	0.043
1559887200	3	0.05
1559887200	6	0.003
1559888100	2	0.041
1559888100	3	0.05
1559888100	6	0.003
1559889000	2	0.015
1559889000	3	0.049
1559889000	6	0.002
1559889900	2	0.025
1559889900	3	0.049
1559889900	6	0.003
1559890800	2	0.026
1559890800	3	0.05
1559890800	6	0.003
1559891700	2	0.015
1559891700	3	0.049
1559891700	6	0.003
1559892600	2	0.017
1559892600	3	0.05
1559892600	6	0.002
1559893500	2	0.024
1559893500	3	0.049
1559893500	6	0.003
1559894400	2	0.022
1559894400	3	0.049
1559894400	6	0.003
1559895300	2	0.011
1559895300	3	0.049
1559895300	6	0.002
1559896200	2	0.025
1559896200	3	0.05
1559896200	6	0.003
1559897100	2	0.024
1559897100	3	0.049
1559897100	6	0.003
1559898000	2	0.015
1559898000	3	0.05
1559898000	6	0.002
1559898900	2	0.015
1559898900	3	0.049
1559898900	6	0.003
1559899800	2	0.023
1559899800	3	0.049
1559899800	6	0.002
1559900700	2	0.021
1559900700	3	0.047
1559900700	6	0.003
1559901600	2	0.01
1559901600	3	0.049
1559901600	6	0.003
1559902500	2	0.022
1559902500	3	0.048
1559902500	6	0.002
1559903400	2	0.023
1559903400	3	0.049
1559903400	6	0.003
1559904300	2	0.014
1559904300	3	0.048
1559904300	6	0.015
1559905200	2	0.016
1559905200	3	0.036
1559905200	6	0.068
1559906100	2	0.023
1559906100	3	0.022
1559906100	6	0.066
1559907000	2	0.07
1559907000	3	0.015
1559907000	6	0.062
1559907900	2	0.013
1559907900	3	0.0
1559907900	6	0.072
1559908800	2	0.023
1559908800	3	0.001
1559908800	6	0.085
1559909700	2	0.022
1559909700	3	0.0
1559909700	6	0.069
1559910600	2	0.01
1559910600	3	0.0
1559910600	6	0.057
1559911500	2	0.021
1559911500	3	0.0
1559911500	6	0.053
1559912400	2	0.022
1559912400	3	0.0
1559912400	6	0.051
1559913300	2	0.015
1559913300	3	0.0
1559913300	6	0.022
1559914200	2	0.015
1559914200	3	0.0
1559914200	6	0.027
1559915100	2	0.022
1559915100	3	0.0
1559915100	6	0.032
1559916000	2	0.021
1559916000	3	0.0
1559916000	6	0.022
1559916900	2	0.017
1559916900	3	0.0
1559916900	6	0.022
1559917800	2	0.051
1559917800	3	0.0
1559917800	6	0.018
1559918700	2	0.05
1559918700	3	0.0
1559918700	6	0.002
1559919600	2	0.041
1559919600	3	0.0
1559919600	6	0.022
1559920500	2	0.055
1559920500	3	0.0
1559920500	6	0.063
1559921400	2	0.055
1559921400	3	0.0
1559921400	6	0.065
1559922300	2	0.069
1559922300	3	0.0
1559922300	6	0.066
1559923200	2	0.046
1559923200	3	0.0
1559923200	6	0.061
1559924100	2	0.046
1559924100	3	0.0
1559924100	6	0.051
1559925000	2	0.045
1559925000	3	0.0
1559925000	6	0.003
1559925900	2	0.049
1559925900	3	0.0
1559925900	6	0.003
1559926800	2	0.051
1559926800	3	0.0
1559926800	6	0.003
1559927700	2	0.045
1559927700	3	0.0
1559927700	6	0.006
1559928600	2	0.032
1559928600	3	0.0
1559928600	6	0.1
1559929500	2	0.028
1559929500	3	0.0
1559929500	6	0.029
1559930400	2	0.05
1559930400	3	0.0
1559930400	6	0.024
1559931300	2	0.048
1559931300	3	0.0
1559931300	6	0.026
1559932200	2	0.038
1559932200	3	0.0
1559932200	6	0.027
1559933100	2	0.042
1559933100	3	0.0
1559933100	6	0.037
1559934000	2	0.024
1559934000	3	0.0
1559934000	6	0.05
1559934900	2	0.015
1559934900	3	0.0
1559934900	6	0.049
1559935800	2	0.017
1559935800	3	0.0
1559935800	6	0.049
1559936700	2	0.023
1559936700	3	0.0
1559936700	6	0.041
1559937600	2	0.022
1559937600	3	0.0
1559937600	6	0.036
1559938500	2	0.011
1559938500	3	0.0
1559938500	6	0.036
1559939400	2	0.08
1559939400	3	0.0
1559939400	6	0.014
1559940300	2	0.051
1559940300	3	0.001
1559940300	6	0.048
1559941200	2	0.04
1559941200	3	0.032
1559941200	6	0.056
1559941200	9	0.025
1559942100	2	0.048
1559942100	3	0.049
1559942100	6	0.054
1559942100	9	0.057
1559943000	2	0.053
1559943000	3	0.048
1559943000	6	0.053
1559943000	9	0.015
1559943900	2	0.048
1559943900	3	0.049
1559943900	6	0.072
1559943900	9	0.053
1559944800	2	0.041
1559944800	3	0.049
1559944800	6	0.077
1559944800	9	0.058
1559945700	2	0.053
1559945700	3	0.048
1559945700	6	0.093
1559945700	9	0.032
1559946600	2	0.055
1559946600	3	0.048
1559946600	6	0.094
1559946600	9	0.169
1559947500	2	0.043
1559947500	3	0.047
1559947500	6	0.093
1559947500	9	0.069
1559948400	2	0.031
1559948400	3	0.047
1559948400	6	0.094
1559948400	9	0.076
1559949300	2	0.037
1559949300	3	0.047
1559949300	6	0.111
1559949300	9	0.06
1559950200	2	0.035
1559950200	3	0.047
1559950200	6	0.107
1559950200	9	0.054
1559951100	2	0.024
1559951100	3	0.048
1559951100	6	0.093
1559951100	9	0.027
1559952000	2	0.035
1559952000	3	0.048
1559952000	6	0.093
1559952000	9	0.026
1559952900	2	0.04
1559952900	3	0.047
1559952900	6	0.09
[truncated: 8,000 more rows]
